# Supplementary material for: Aminoglycoside use in paediatric febrile neutropenia – Outcomes from a nationwide prospective cohort study
Source: PubMed Central journal article supplement (PMC7494114; doi:10.1371/journal.pone.0238787), 2020-09-16
Supplement: pone.0238787.s001.pdf [file pone.0238787.s001.pdf]

**S1 Table. Aminoglycoside receipt in those who met and who did not meet criteria for use in the 1st 12 hours by state**

| <b>Qualified for aminoglycoside<sup>a</sup></b>       |               |              |              |              |              |              |
|-------------------------------------------------------|---------------|--------------|--------------|--------------|--------------|--------------|
| <b>Total qualified = 400 (46.6%)</b>                  |               |              |              |              |              |              |
| <b>State<sup>b</sup></b>                              | <b>VIC</b>    | <b>QLD</b>   | <b>NSW</b>   | <b>SA</b>    | <b>WA</b>    | <b>Total</b> |
|                                                       | <b>N (%)</b>  | <b>N (%)</b> | <b>N (%)</b> | <b>N (%)</b> | <b>N (%)</b> | <b>N (%)</b> |
| <b>Received aminoglycoside</b>                        | 115<br>(53.5) | 6 (37.5)     | 94 (58)      | 1 (25)       | 0 (0)        | 216 (54)     |
| <b>Did not receive aminoglycoside</b>                 | 100<br>(46.5) | 10 (62.5)    | 68 (42)      | 3 (75)       | 3 (100)      | 184 (46)     |
| <b>Did not qualify for aminoglycoside<sup>a</sup></b> |               |              |              |              |              |              |
| <b>Total did not qualify = 458 (53.4%)</b>            |               |              |              |              |              |              |
| <b>State<sup>b</sup></b>                              | <b>VIC</b>    | <b>QLD</b>   | <b>NSW</b>   | <b>SA</b>    | <b>WA</b>    | <b>Total</b> |
|                                                       | <b>N (%)</b>  | <b>N (%)</b> | <b>N (%)</b> | <b>N (%)</b> | <b>N (%)</b> | <b>N (%)</b> |
| <b>Received aminoglycoside</b>                        | 26 (12.3)     | 11 (7)       | 0 (0)        | 2 (3.2)      | 0 (0)        | 39 (9)       |
| <b>Did not receive aminoglycoside</b>                 | 186<br>(87.7) | 146 (93)     | 0 (0)        | 61 (96.8)    | 26 (100)     | 419 (91)     |
| <b>Total</b>                                          | <b>427</b>    | <b>173</b>   | <b>162</b>   | <b>67</b>    | <b>29</b>    | <b>858</b>   |

<sup>a</sup>Qualified=met local criteria for aminoglycoside

<sup>b</sup>State: VIC=Victoria, QLD=Queensland, NSW=New South Wales, SA=South

Australia, WA=Western Australia
