# Supplementary material for: Aminoglycoside use in paediatric febrile neutropenia – Outcomes from a nationwide prospective cohort study
Source: PubMed Central journal article supplement (PMC7494114; doi:10.1371/journal.pone.0238787), 2020-09-16
Supplement: pone.0238787.s002.pdf [file pone.0238787.s002.pdf]

**S1 Fig. Outcome-free survival to 30 days by treatment group**

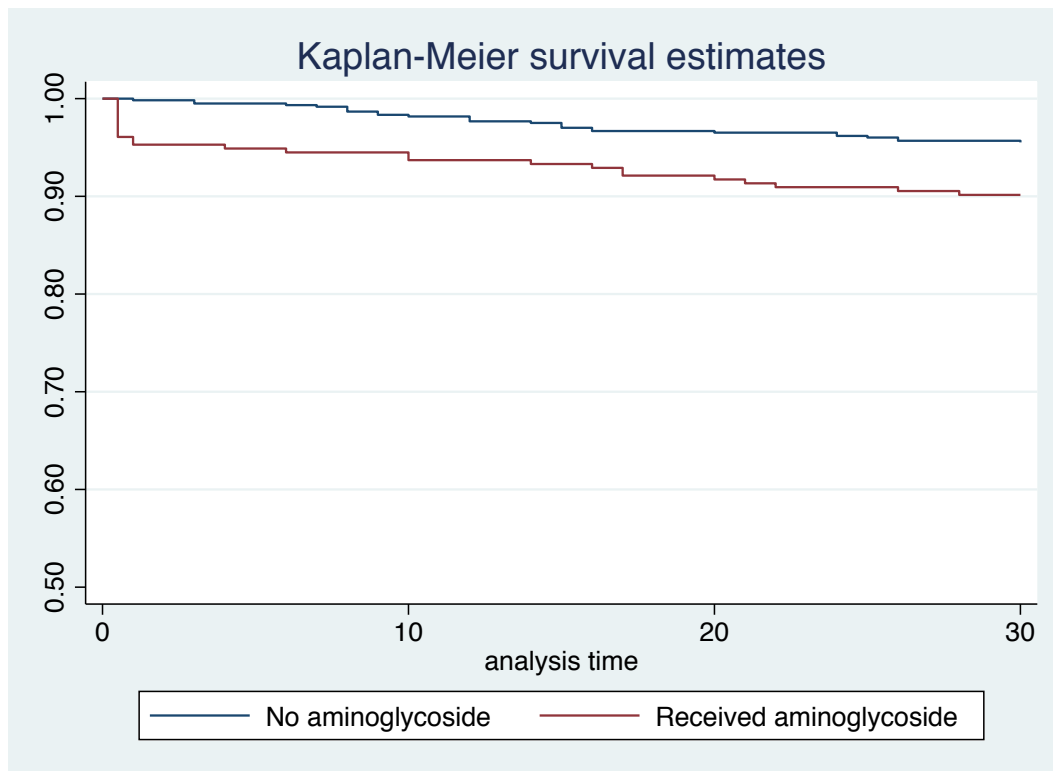

Log-rank test for equality of survivor functions  $P=0.0006$
