# Supplementary material for: Aminoglycoside use in paediatric febrile neutropenia – Outcomes from a nationwide prospective cohort study
Source: PubMed Central journal article supplement (PMC7494114; doi:10.1371/journal.pone.0238787), 2020-09-16

**S2 Fig. Balance plot before and after propensity matching**

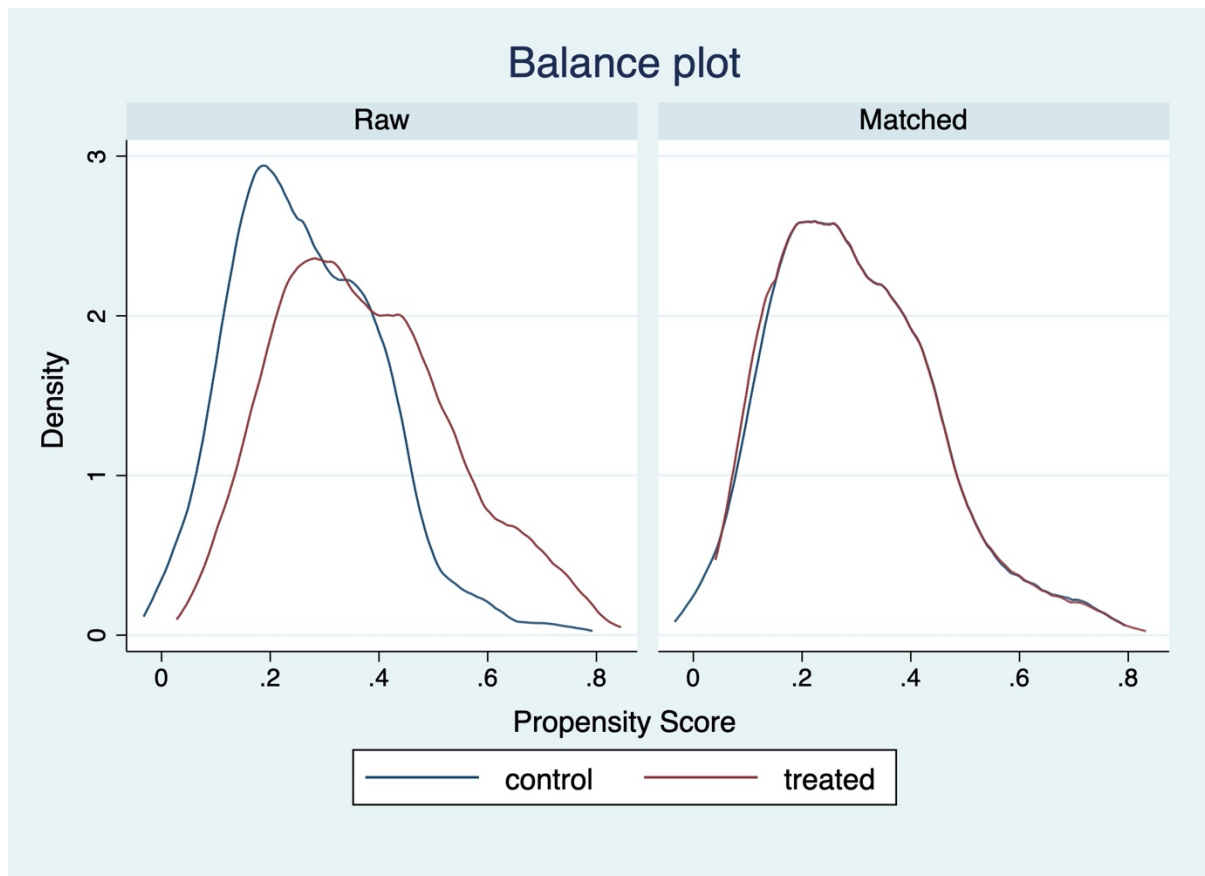

Supplement: pone.0238787.s003.pdf [file pone.0238787.s003.pdf]
